# Supplementary material for: Controlling with light the interaction betweentrans-tetrapyridyl ruthenium complexes and an oligonucleotide
Source: Royal Society of Chemistry journal article supplement (doi:10.1039/c7dt03613b), 2017-11-23
Supplement: c7dt03613b1.pdf [file c7dt03613b1.pdf]

# Controlling with light the interaction between *trans* tetrapyridyl ruthenium complexes and an oligonucleotide

Vincent H.S. van Rixel,<sup>a</sup> Geri F. Molenaar,<sup>a</sup> Maxime A. Siegler,<sup>b</sup> Luigi Messori,<sup>c</sup> Sylvestre Bonnet<sup>\*a</sup>

<sup>a</sup>Leiden University, Leiden Institute of Chemistry, Gorlaeus Laboratories, P.O. Box 9502, 2300 RA Leiden, The Netherlands

<sup>b</sup>Small Molecule X-ray Crystallography Facility, Johns Hopkins University 3400N. Charles St. Baltimore, MD, 21218, USA

<sup>c</sup>University of Florence, Department of Chemistry, Via della Lastruccia 3, 50019 Sesto Fiorentino (FI), Italia

Corresponding author e-mail: [bonnet@chem.leidenuniv.nl](mailto:bonnet@chem.leidenuniv.nl)

## Supporting Information

|                                                               |   |
|---------------------------------------------------------------|---|
| Proton numbering scheme for NMR assignment.....               | 2 |
| Mass and UV-vis spectra for the photoreactivity studies ..... | 3 |
| Gel studies.....                                              | 8 |
| Data for the ESI-HRMS experiments with the ODN.....           | 9 |

## Proton numbering scheme for NMR assignment

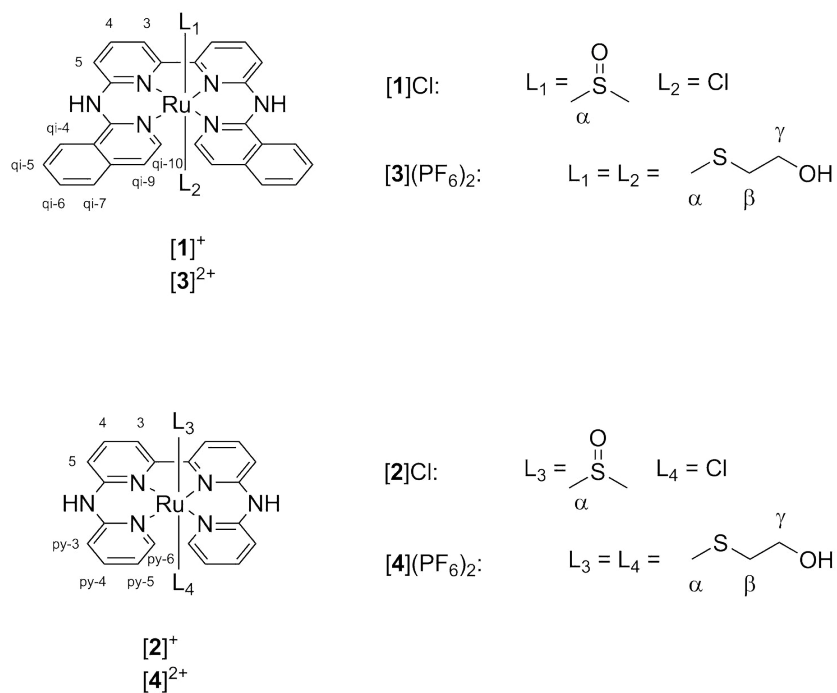

**Figure S1. Chemical structure of [Ru(bapbpy)L<sub>2</sub>] and of [Ru(biqbpy)L<sub>2</sub>] and atom numbering used in NMR attribution.**

## Mass and UV-vis spectra for the photoreactivity studies

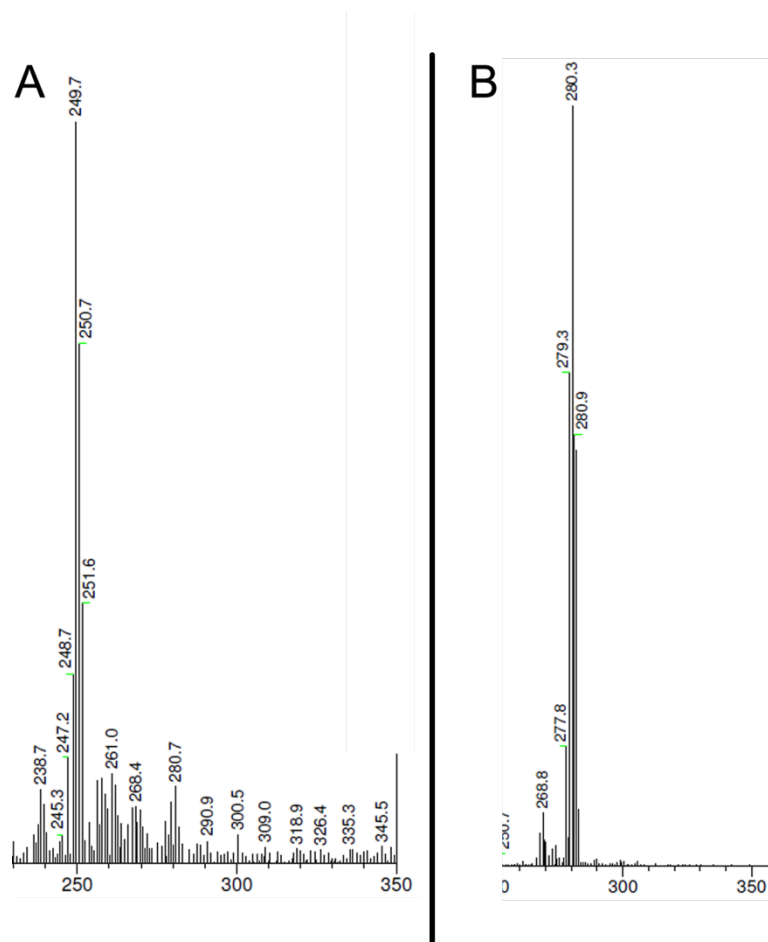

**Figure S2.** Mass spectra of complex [2]Cl in the dark (A) with calc.  $m/z = 280.0$  for  $[1 - \text{Cl} + \text{CD}_3\text{OD}]^{2+}$  and after blue light irradiation (B) with calc.  $m/z = 250.0$  for  $[\text{Ru}(\text{biqbpy}) + \text{H}_2\text{O} + \text{CD}_3\text{OD}]^{2+}$  and measured in MeOH.  $\lambda_{\text{irr}} = 445 \text{ nm}$ ,  $\Delta\lambda_{1/2} = 22 \text{ nm}$ , photon flux  $\Phi = 1.81 \times 10^{-7} \text{ mol.s}^{-1}$ ,  $t_{\text{irr}} = 10 \text{ min}$ .

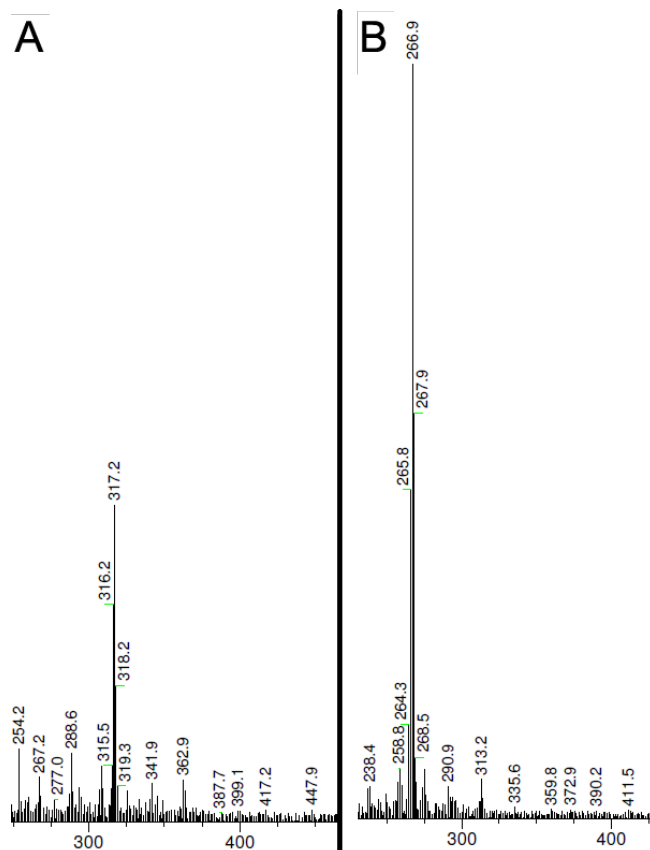

Figure S3. Mass spectra of complex [3](PF<sub>6</sub>)<sub>2</sub> (A) And [4](PF<sub>6</sub>)<sub>2</sub> (B) with calc. m/z = 317.1 for [Ru(biqbpy)(Hmte) – Hmte]<sup>2+</sup> and calc. m/z = 267.0 for [Ru(bapbpy)(Hmte) – Hmte]<sup>2+</sup> after light-activation ( $\lambda_{\text{irr}} = 445$  nm,  $\Delta\lambda_{1/2} = 22$  nm, photon flux photon flux  $\Phi = 1.81 \times 10^{-7}$  mol.s<sup>-1</sup>,  $t_{\text{irr}} = 10$  min) measured in MeOH.

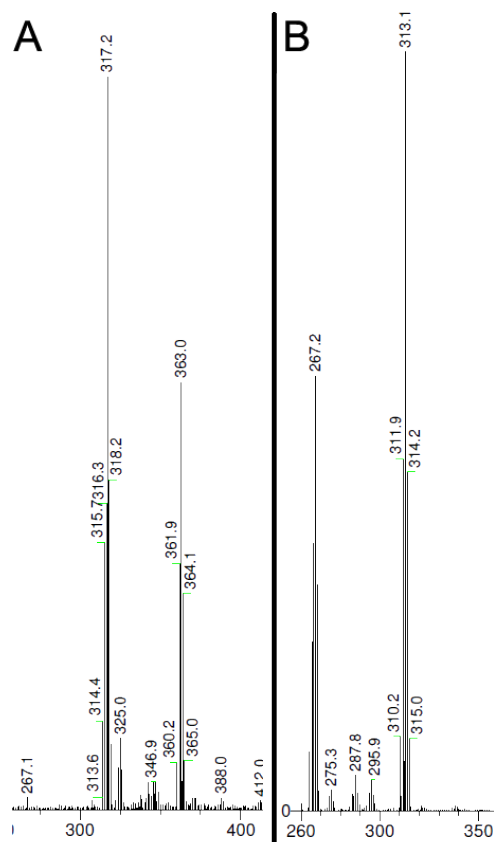

Figure S4. Mass spectra of complex [3](PF<sub>6</sub>)<sub>2</sub> (A) and [4](PF<sub>6</sub>)<sub>2</sub> (B) with calc. m/z = 267.0 for [Ru(biqbpy)(Hmte) – Hmte]<sup>2+</sup>, calc. m/z = 313.1 for [Ru(biqbpy)(Hmte)<sub>2</sub>]<sup>2+</sup>, calc. m/z = 326.1 for [Ru(bapbpy)(Hmte) – Hmte]<sup>2+</sup>, and calc. m/z = 363.1 for [Ru(biqbpy)(Hmte)<sub>2</sub>]<sup>2+</sup> measured in MeOH.

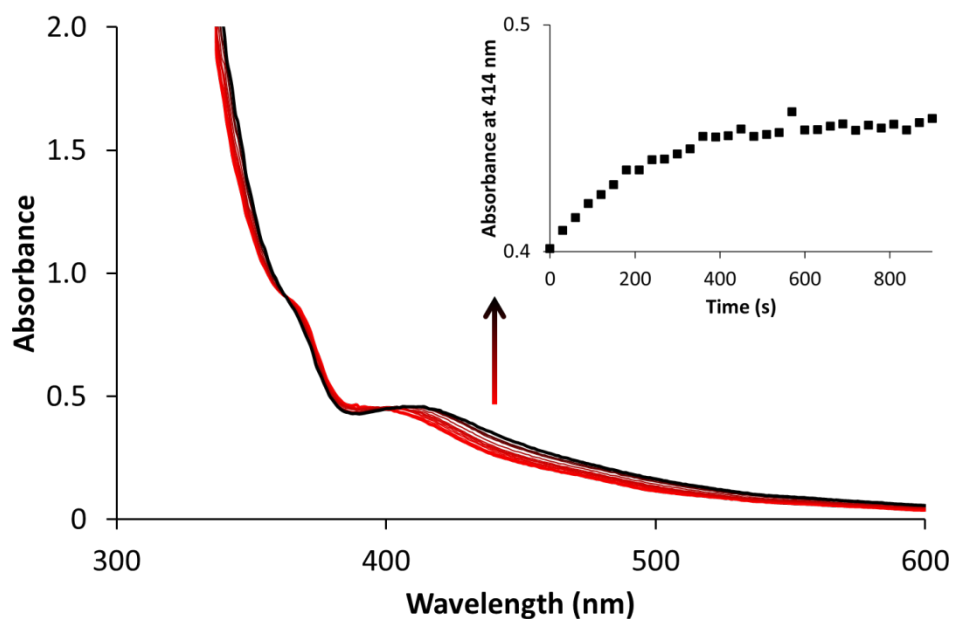

Figure S5. Evolution of the electronic absorption spectra of a solution of [4](PF<sub>6</sub>)<sub>2</sub> in demineralized water (5 v/v% Acetone-d<sub>6</sub>) upon blue light irradiation ( $\lambda_{\text{irr}} = 445 \text{ nm}$ ,  $\Delta\lambda_{1/2} = 22 \text{ nm}$ , photon flux  $\Phi = 1.81 \times 10^{-7} \text{ mol.s}^{-1}$ ,  $t_{\text{irr}} = 15 \text{ min}$ ). Time: 0 min (red curve) to 15 min (black curve). Conditions [Ru]<sub>0</sub> = 0.05 mM, irradiated volume was 3.0 mL at 298 K. Inset: Plot of the absorbance at 414 nm as a function of irradiation time.

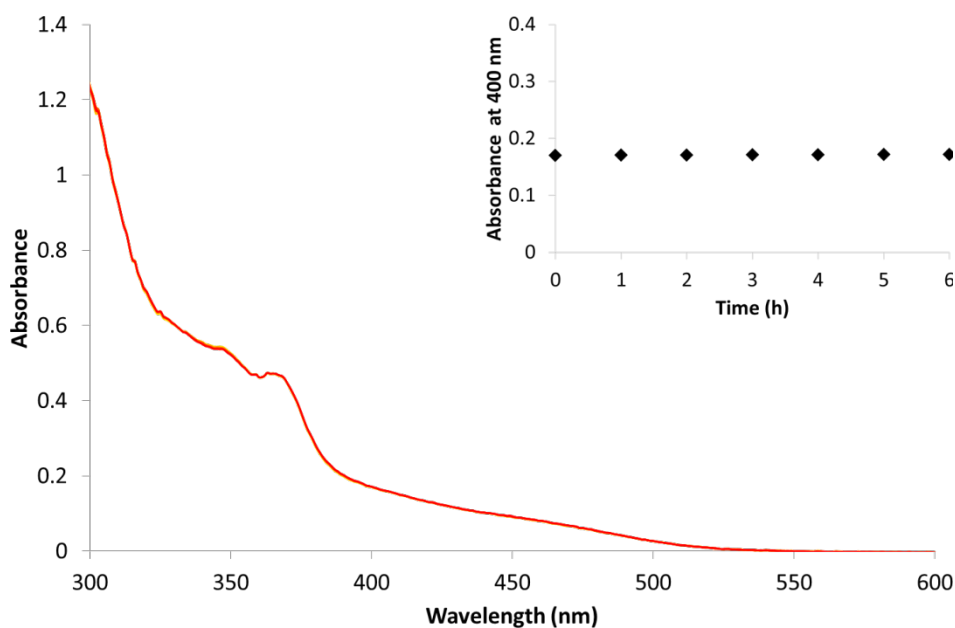

Figure S6. Stability of the UV-vis absorption spectrum of a solution of [2]Cl in demineralized water over 6 hours in the dark. Inset: evolution of absorbance at 400 nm. Conditions: [Ru] = 0.05 mM, T = 298 K.

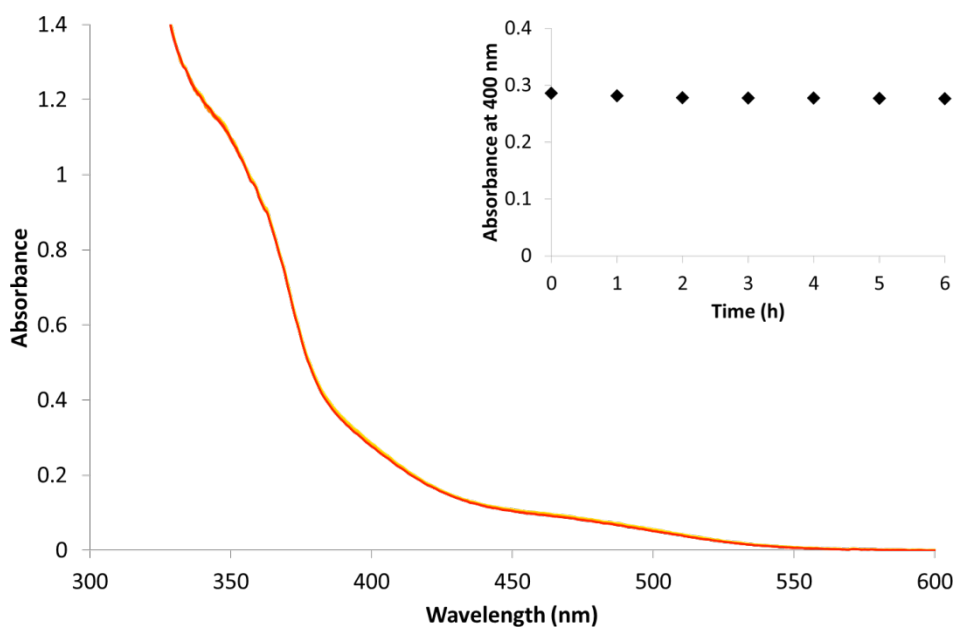

Figure S7. Stability of the UV-vis absorption spectrum of a solution of [1]Cl in demineralized water over 6 hours in the dark. Inset: evolution of absorbance at 400 nm. Conditions: [Ru] = 0.05 mM, T = 298 K.

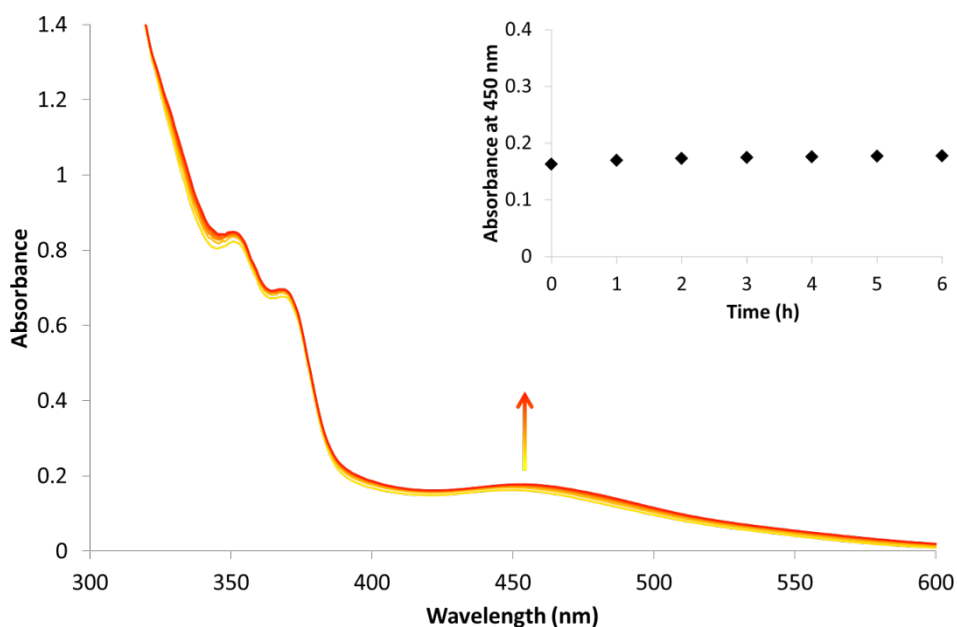

Figure S8. Evolution of UV-vis spectrum of [3](PF<sub>6</sub>)<sub>2</sub> over 6 hours in demineralized water in the dark. Inset: evolution of absorbance at 450 nm. Conditions: [Ru] = 0.05 mM, T = 298 K.

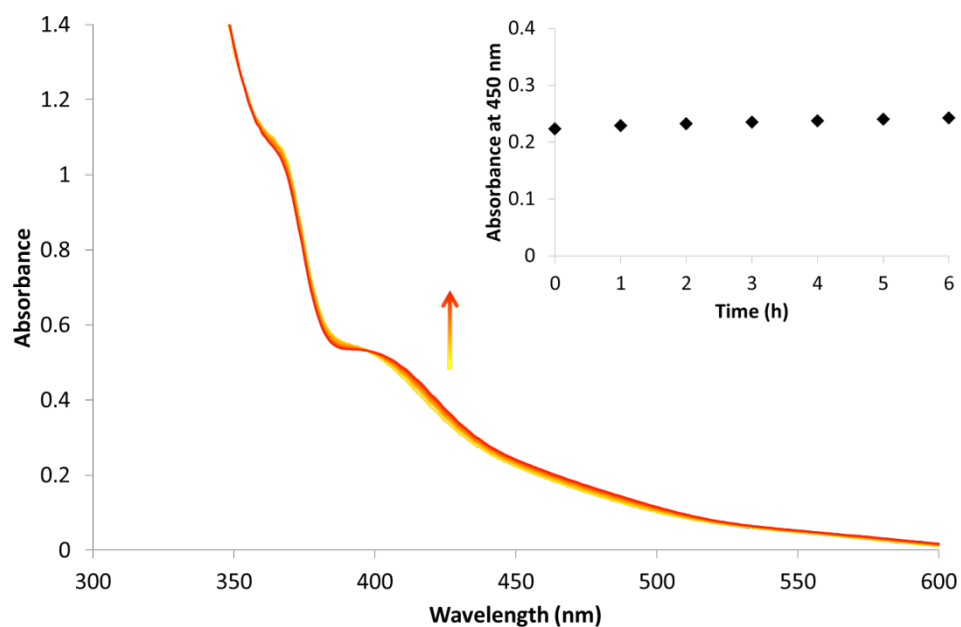

**Figure S9.** Evolution of UV-vis spectrum of [4](PF<sub>6</sub>)<sub>2</sub> over 6 hours in demineralized water in the dark. Inset: evolution of absorbance at 450 nm. Conditions: [Ru] = 0.05 mM, T = 298 K

## Gel studies

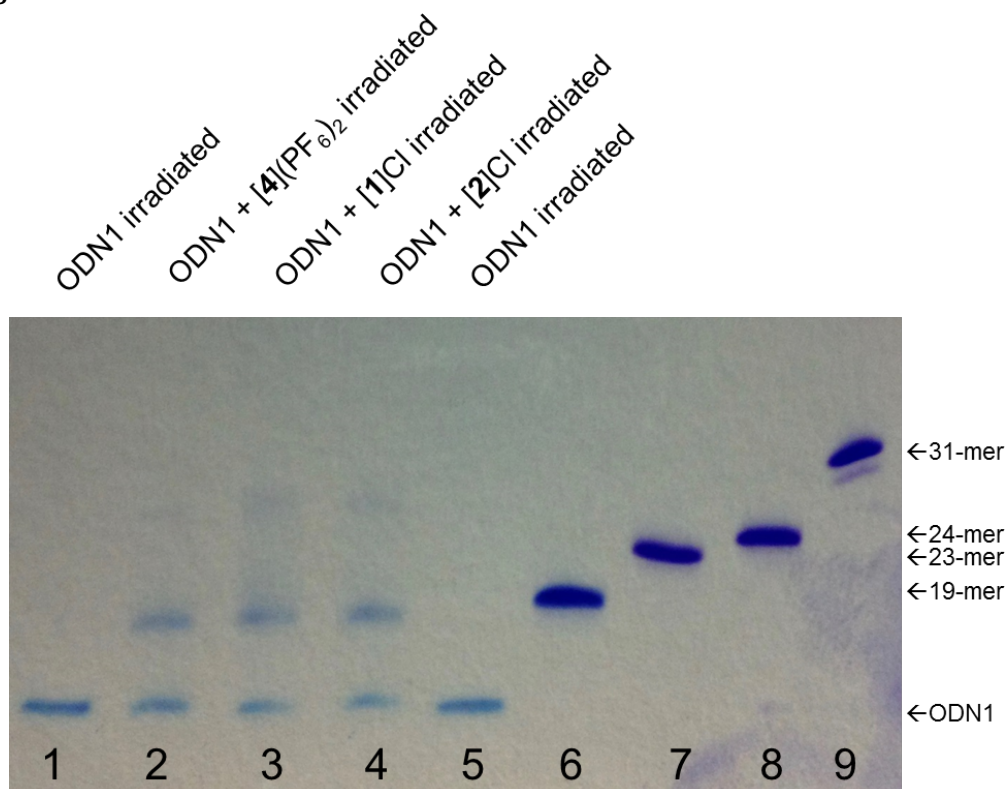

**Figure S10.** Light-induced binding of [1]Cl, [2]Cl, or [4](PF<sub>6</sub>)<sub>2</sub> (lane 2, 3, and 4) analyzed by polycamide gel including ODN1 (dark, lane 1), ODN1 (irradiated, lane 5), 19, 23, 24, 31-mer control. Conditions: T = 25 °C, [Ru] = 0.75 mM, [ODN] = 0.25 mM, Staining agent: Toluidine blue,  $\lambda_{\text{irr}} = 445 \text{ nm}$ ,  $\Delta\lambda_{1/2} = 22 \text{ nm}$ , photon flux  $\Phi = 2.2 \times 10^{-7} \text{ mol.s}^{-1}$ ,  $t_{\text{irr}} = 10 \text{ min}$ .



## Data for the ESI-HRMS experiments with the ODN

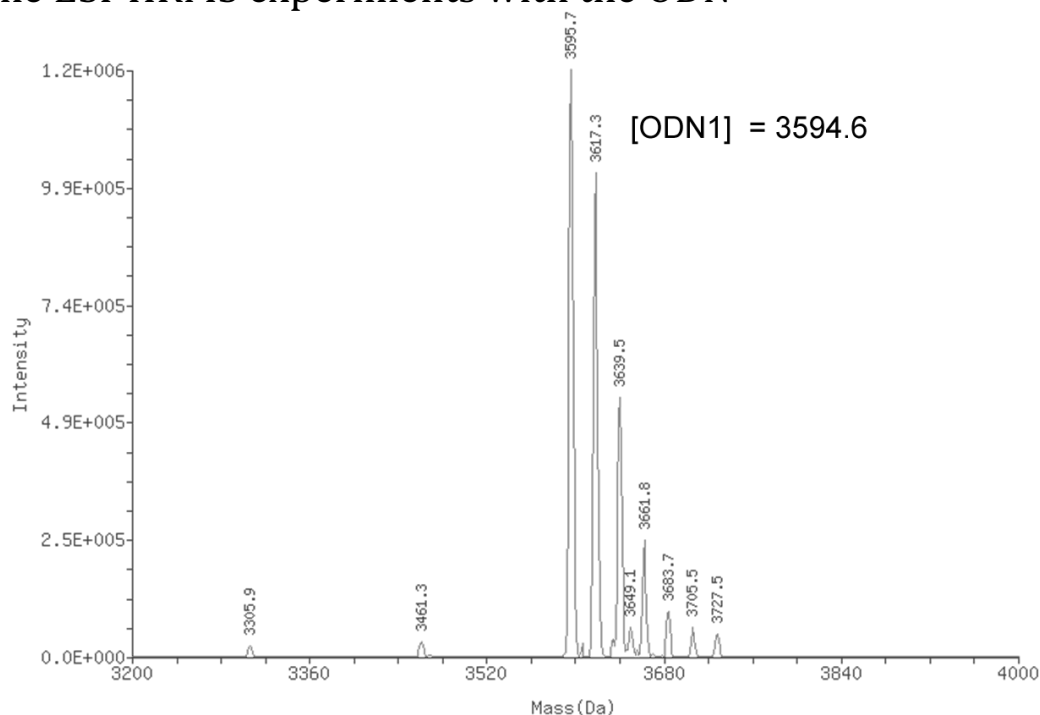

**Figure S11.** Deconvoluted mass spectrometry data of ODN1 ( $s^{(5')CTACGGTTTCAC^{3'}}$ ), see Scheme S12, or  $C_{116}H_{149}N_{40}O_{72}P_{11}$ ). Conditions: [ODN] = 0.03 mM, incubation time 6 h,  $T = 298$  K.

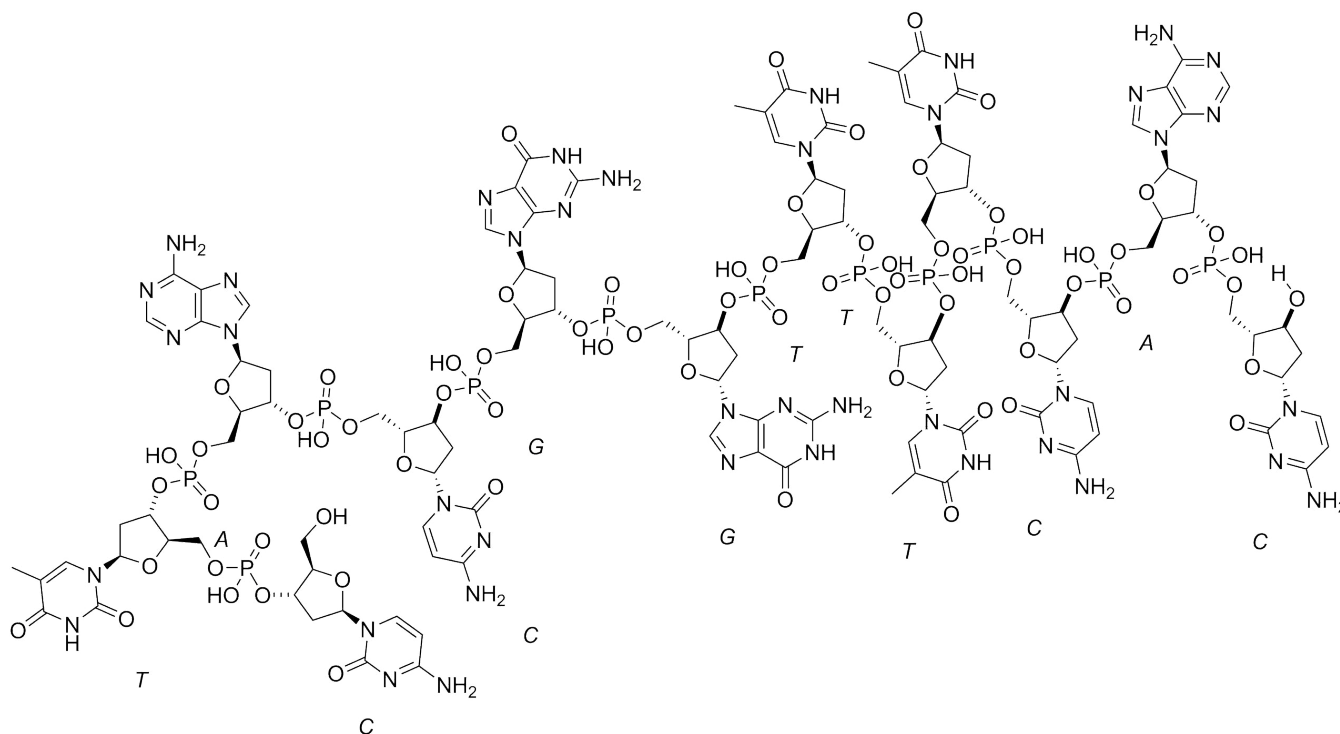

**Figure S12.** Chemical structure of ODN1 ( $s^{(5')CTACGGTTTCAC^{3'}}$ ). Molecular formula is  $C_{116}H_{149}N_{40}O_{72}P_{11}$ ,  $m/z = 3595.64$ .

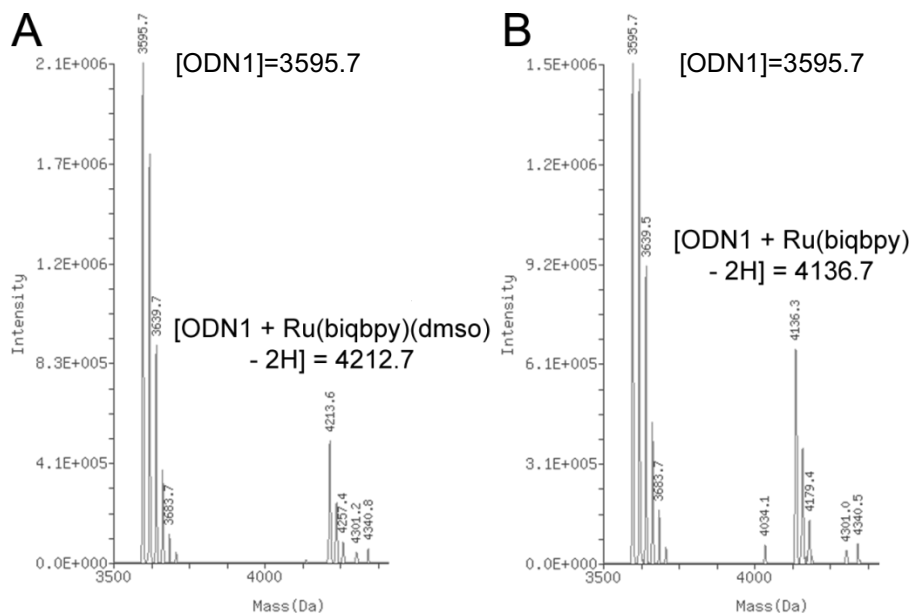

**Figure S13.** Deconvoluted mass spectrometry data of ODN1 and [1]Cl incubated in the dark (A) or after light-activation (B). Conditions: [ODN] = 0.03 mM, [Ru] = 0.09 mM,  $t_{\text{incubation}} = 6$  h,  $T = 298$  K,  $\lambda_{\text{irr}} = 445$  nm,  $\Delta\lambda_{1/2} = 22$  nm, photon flux  $\Phi = 2.17 \times 10^{-7}$  mol.s<sup>-1</sup>.

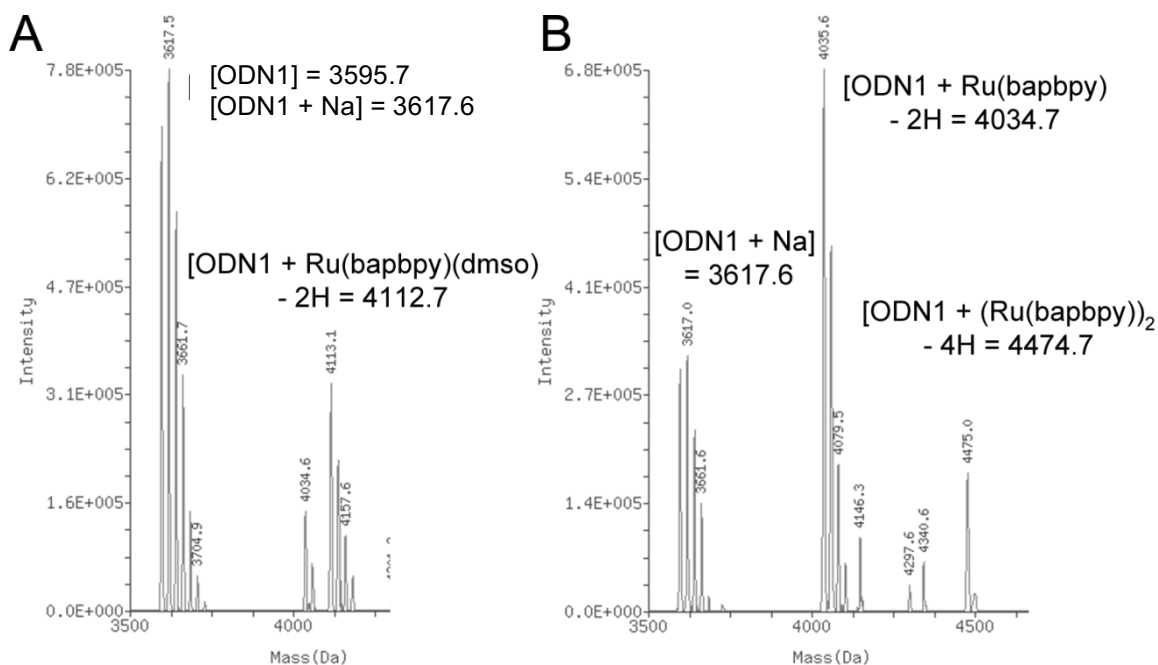

**Figure S14.** Deconvoluted mass spectrometry data of ODN1 and [2]Cl incubated in the dark (A) or after light-activation (B). Conditions: [ODN] = 0.03 mM, [Ru] = 0.09 mM,  $t_{\text{incubation}} = 6$  h,  $T = 298$  K,  $\lambda_{\text{irr}} = 445$  nm,  $\Delta\lambda_{1/2} = 22$  nm, photon flux  $\Phi = 2.17 \times 10^{-7}$  mol.s<sup>-1</sup>.

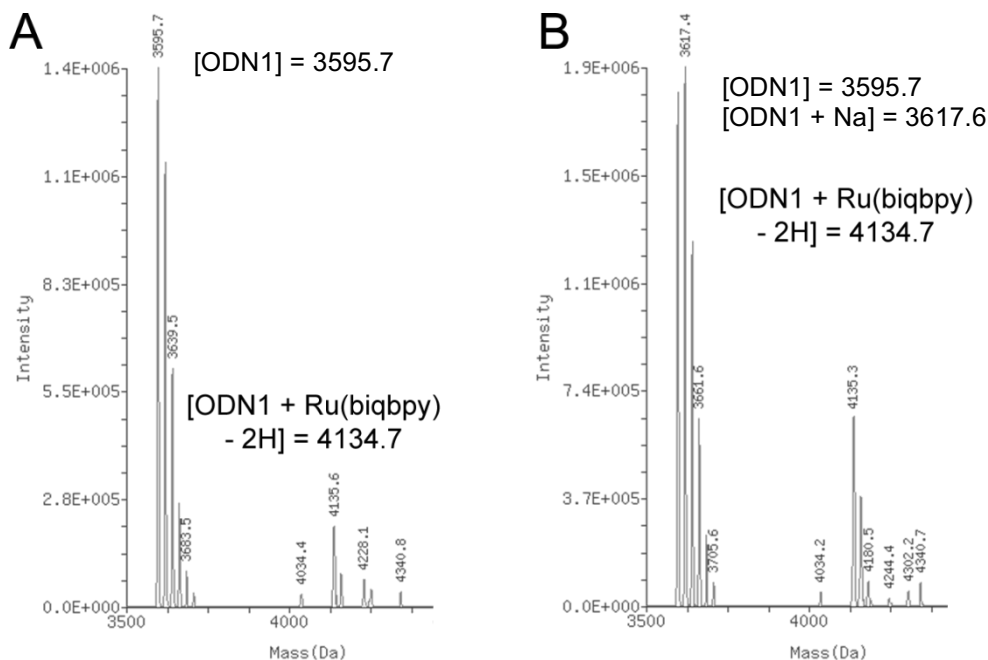

**Figure S15.** Deconvoluted mass spectrometry data of ODN1 and [3](PF<sub>6</sub>)<sub>2</sub> incubated in the dark (A) or after light-activation (B). Conditions: [ODN] = 0.03 mM, [Ru] = 0.09 mM,  $t_{\text{incubation}}$  = 6 h, T = 298 K  $\lambda_{\text{irr}}$  = 445 nm,  $\Delta\lambda_{1/2}$  = 22 nm, photon flux  $\Phi$  =  $2.17 \times 10^{-7}$  mol.s<sup>-1</sup>.

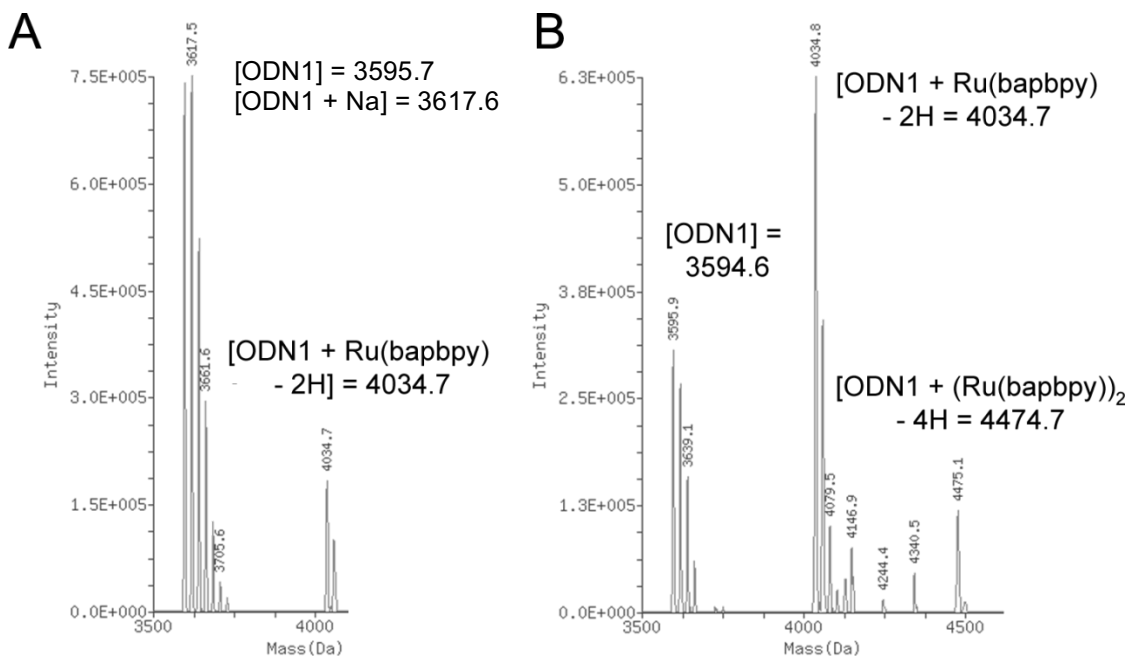

**Figure S16.** Deconvoluted mass spectrometry data of ODN1 and [4](PF<sub>6</sub>)<sub>2</sub> incubated in the dark (A) or after light-activation (B). Conditions: [ODN] = 0.03 mM, [Ru] = 0.09 mM,  $t_{\text{incubation}}$  = 6 h, T = 298 K,  $\lambda_{\text{irr}}$  = 445 nm,  $\Delta\lambda_{1/2}$  = 22 nm, photon flux  $\Phi$  =  $2.17 \times 10^{-7}$  mol.s<sup>-1</sup>.
